# Supplementary material
Source: PubMed Central journal article supplement (PMC9870640)

## Supplemental Data for

Sloan-Aagard C, Glenn J, Nanez J, Crawford SB, Currey J, Hartmann E. The impact of community health information exchange usage on time to reutilization of hospital services. *Ann Fam Med.* 2023;21(1):19-26.

**Supplemental Table 1.** Table showing how insurance providers listed in patient records was used to assign categories of insurance providers. Alternate and misspellings of the words listed were also included.

| <b>Insurance Category</b> | <b>Insurance Listed in Record</b>                                             |
|---------------------------|-------------------------------------------------------------------------------|
| Medicare                  | Medicare, Wellmed, Bienvivir, Humana, MCR                                     |
| Medicaid                  | Medicaid, Medicaid pending, MCD pend, El Paso, Superior                       |
| Self-Pay                  | Self-pay                                                                      |
| Uninsured                 | Charity, ER Med, Uninsured, Homeless, Indigent                                |
| Military                  | Veterans, Tricare, VA Tri                                                     |
| Law Enforcement           | Immigration, Border, ICE, Jail, Marshall, Sheriff, Victim, Refugee, Detention |
| Private                   | All Others                                                                    |

**Supplemental Table 2.** Cross-tabulation, unadjusted odds ratios, and p-values of each case group and controls by whether they were looked up in the HIE by a PCP.

| <b>Case group</b>             |                     |                    |                         | <b>Odds Ratio</b> | <b>p-value</b>          |
|-------------------------------|---------------------|--------------------|-------------------------|-------------------|-------------------------|
| Case Group 1: ED visit        |                     | HIE lookup (N=210) | No HIE lookup (N=5,379) |                   |                         |
|                               | Cases (N= 3,809)    | 107                | 3,702                   |                   |                         |
|                               | Controls (N= 1,780) | 103                | 1,677                   |                   |                         |
|                               |                     |                    |                         | 0.47 (0.36-0.62)  | 1.37 x 10 <sup>-7</sup> |
| Case Group 2: Inpatient visit |                     | HIE lookup (N=163) | No HIE lookup (N=4,244) |                   |                         |
|                               | Cases (N=2,627)     | 60                 | 2,567                   |                   |                         |
|                               | Controls (N=1,780)  | 103                | 1,677                   |                   |                         |
|                               |                     |                    |                         | 0.38 (0.28-0.53)  | 2.54 x 10 <sup>-9</sup> |

**Supplemental Figure 1.** Histogram of the length of time in days between a patient's study PCP visit post-hospital discharge and a patient being looked up in the HIE.

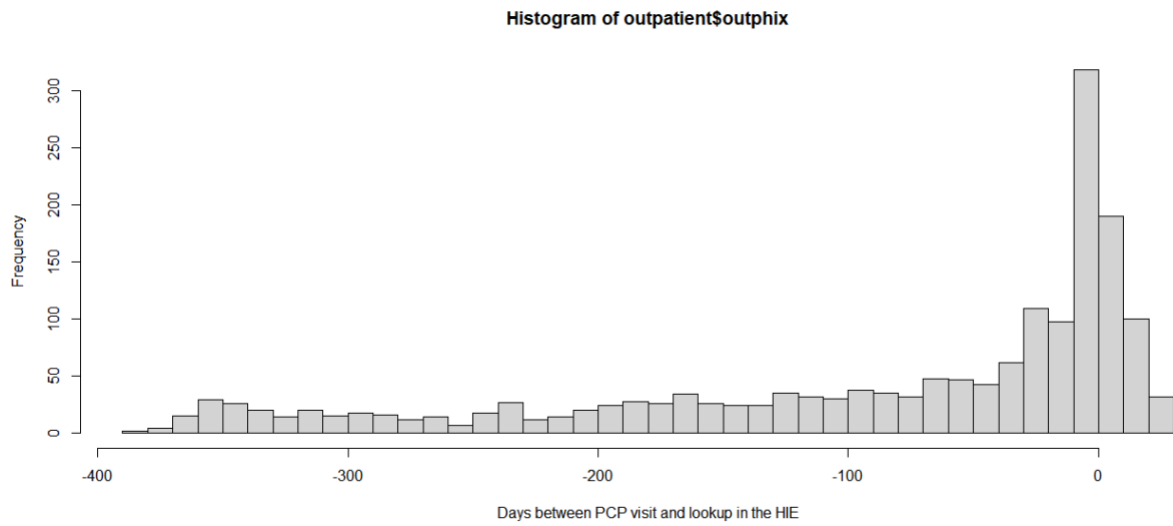

**Supplemental Figure 2.** Histogram between the length of time between a patient's first inpatient discharge and their PCP visit. All visits were within 30 days, as per the cohort definition.

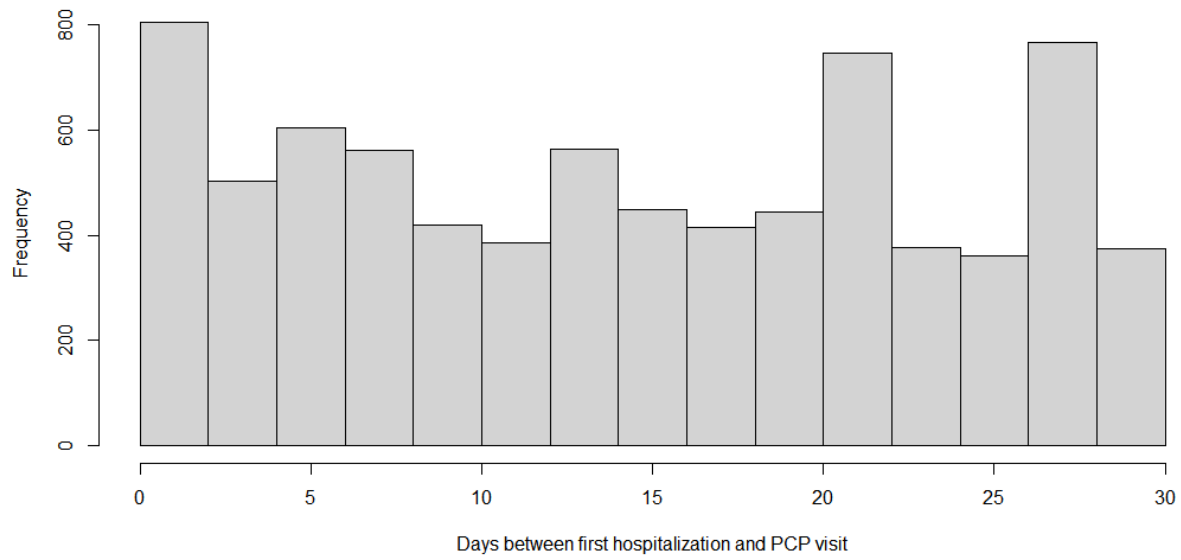

**Supplemental Figure 3.** Proportion of ICD-10 code groups reported during hospital visits for all variables included in the Cox Proportional Hazards model, divided by the first inpatient visit (top row) and the second visit (ED or inpatient combined, cases only) and whether the HIE was accessed between the first and second visit by a PCP.

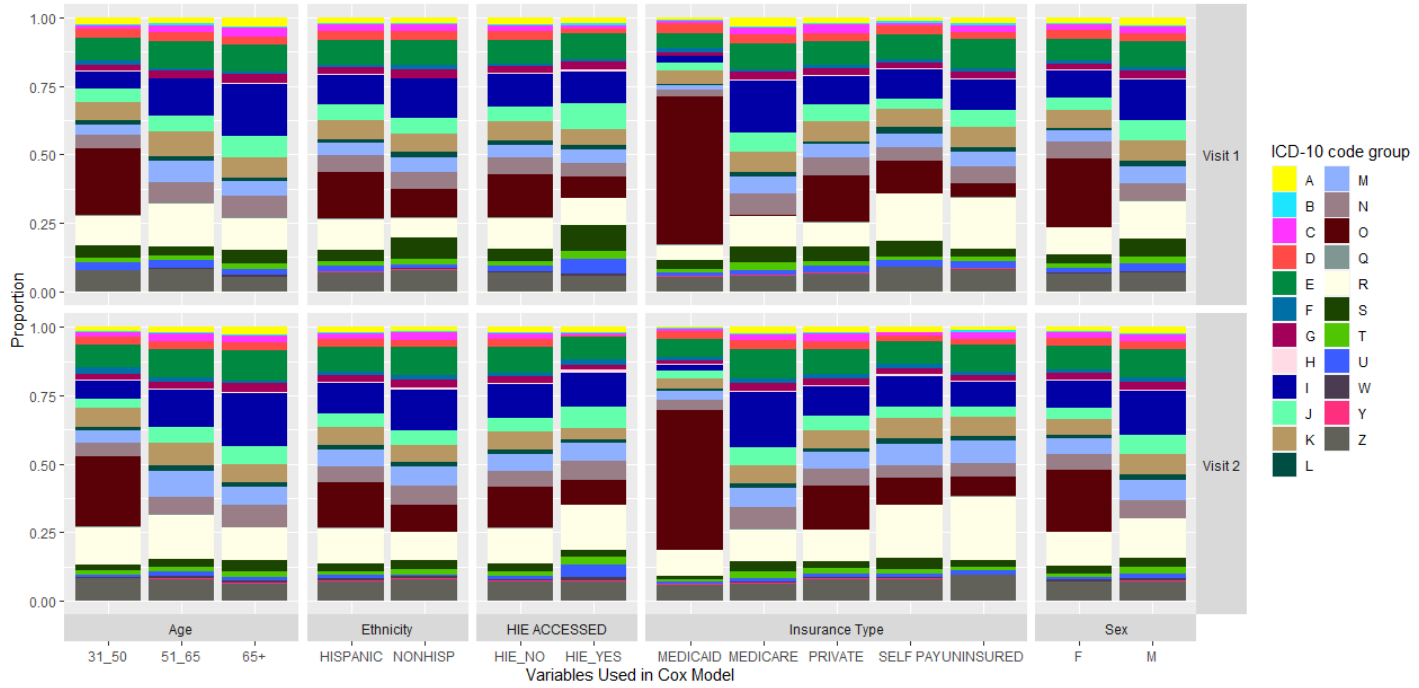

Supplement: Sloan.pdf [file Sloan.pdf]
